# Supplementary material for: Protein-modified hollow copper sulfide nanoparticles carrying indocyanine green for photothermal and photodynamic therapy
Source: Royal Society of Chemistry journal article supplement (doi:10.1039/c5tb02002f), 2015-11-17
Supplement: c5tb02002f1.pdf [file c5tb02002f1.pdf]

## **Electronic Supplementary Information**

### **Protein-modified hollow copper sulfide nanoparticles carrying indocyanine green for photothermal and photodynamic therapy**

Lu Han, Yang Zhang, Xu-Wei Chen, Yang Shu\* and Jian-Hua Wang\*

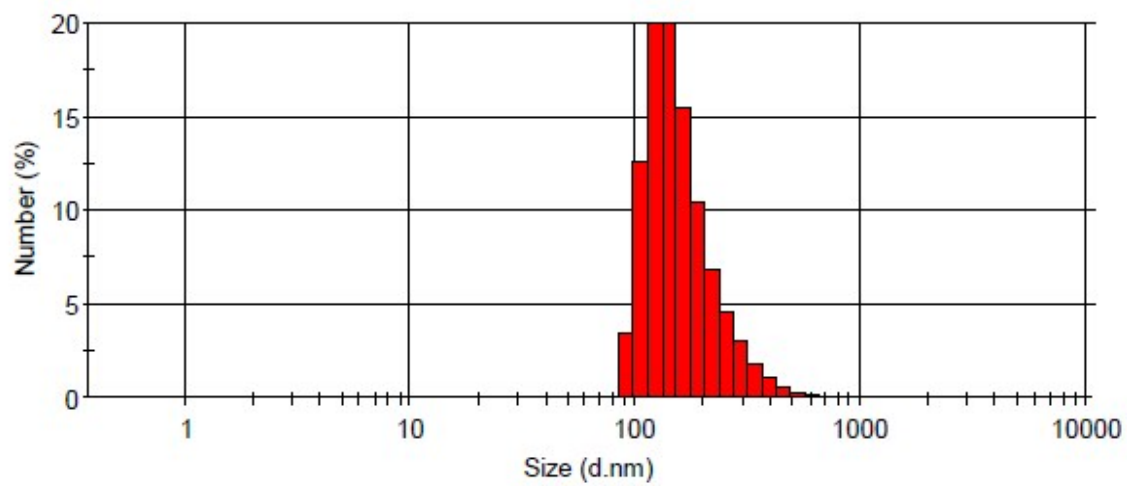

Fig. S1. The size distribution of hollow CuS nanoparticles measured by DLS.

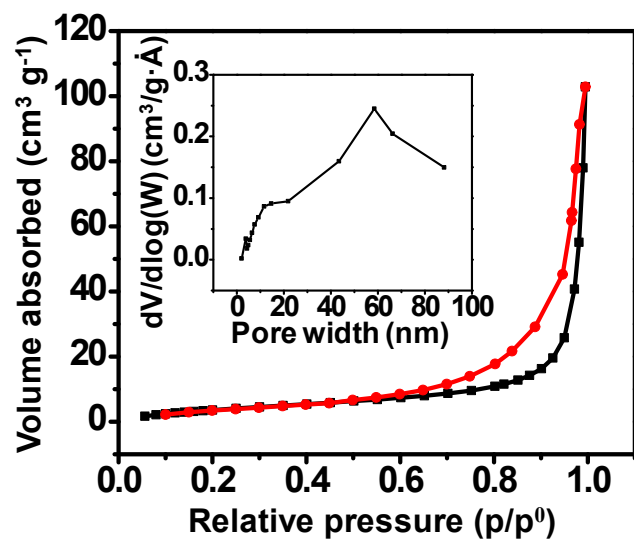

Fig. S2. Nitrogen adsorption-desorption isotherms of the obtained hollow CuS. Inset: pore size distribution of hollow CuS.

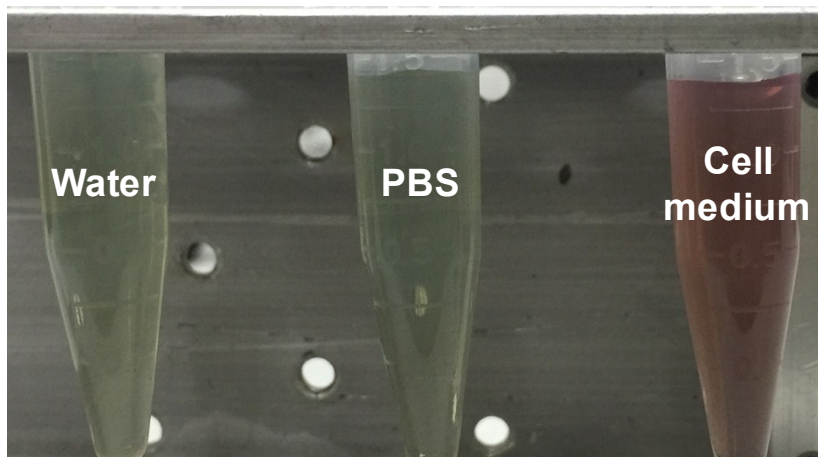

Fig. S3. Digital images of CuS-BSA-FA dispersed in water, PBS and DMEM supplemented with 10% fetal bovine serum ( $240 \mu\text{g mL}^{-1}$ ) for one week.

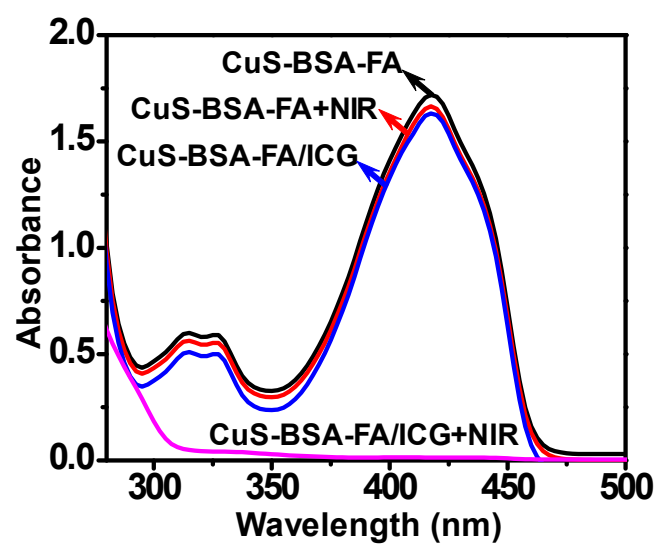

Fig. S4. UV-vis absorption spectra of DPBF (0.08 mM, 1 W cm<sup>-2</sup>, 10 min). CuS-BSA-FA: 60 μg mL<sup>-1</sup>; ICG: 6 μg mL<sup>-1</sup>; CuS-BSA-FA/ICG: 60 μg mL<sup>-1</sup> for CuS-BSA-FA and 6 μg mL<sup>-1</sup> for ICG.
